# Supplementary material for: A Ni-MOF nanosheet array for efficient oxygen evolution electrocatalysis in alkaline media
Source: Royal Society of Chemistry journal article supplement (doi:10.1039/d1qi00345c), 2021-01-01
Supplement: d1qi00345c1.pdf [file d1qi00345c1.pdf]

## Electronic Supplementary Information

### Experimental section

**Materials:** Nickel foam (NF) was provided by Hangxu Filters Flag Store, Hengshui, Hebei. 4,4'-Biphenyl dicarboxylic acid ( $C_{14}H_{10}O_4$ ) was purchased from Shanghai Haohong Scientific Co., Ltd. N,N-dimethylformamide (DMF) and  $NiCl_2 \cdot 6H_2O$  were purchased from Aladdin Ltd. in Shanghai. Hydrochloric acid (HCl) and  $C_2H_5OH$  were purchased from Chengdu Kelon Chemical Reagent Factory.  $RuO_2$  was purchased from Shanghai Macklin Biochemical Co., Ltd. Nafion (5 wt%) solution was purchased from Sigma-Aldrich Chemical Reagent Co., Ltd. All chemical reagents were used as received without further purification. The water used throughout all experiments was purified through a Millipore system.

**Preparation of the Ni-MOF/NF:** The in situ growth of Ni-MOF nanosheet array on NF was carried out via a one-step solvothermal reaction. A piece of NF was first treated with 1 M HCl, ethanol and deionized water by ultrasonic cleaning sequentially before use. 0.4 mmol  $NiCl_2 \cdot 6H_2O$  (0.0951 g) and 0.4 mmol  $C_{14}H_{10}O_4$  (0.0969 g) were dissolved in 25 mL DMF to form a solution, 2.5 mL ethanol and 2.5 mL deionized water were added slowly to the solution under constant stirring. Then the solution was transferred to a 40 mL Teflon-lined stainless-steel autoclave in which a piece of treated NF ( $2.5 \times 4$  cm) was immersed into the solution. The autoclave was sealed and maintained at 125 °C for 8 h in an electric oven to obtain Ni-MOF/NF. After the autoclave cooled down naturally, the Ni-MOF/NF was taken out and washed with water and ethanol for several times, followed by drying 12 h at 60 °C.

**Preparation of the  $RuO_2$ /NF:** 20 mg commercial  $RuO_2$  and 40  $\mu$ L 5 wt% Nafion solution were dispersed in 960  $\mu$ L ethanol/water (v/v = 3:1) followed by 30 min sonication to form a homogeneous ink. Then 20  $\mu$ L ink was loaded onto a NF ( $0.5 \times 0.5$  cm) and dried under ambient condition ( $RuO_2$  loading: 1.6 mg  $cm^{-2}$ ). The Ni-MOF powder/NF electrode was also prepared according to above method.

**Characterizations:** XRD pattern was obtained from a Shimadzu XRD-6100 diffractometer with Cu K $\alpha$  radiation (40 kV, 30 mA) of wavelength 0.154 nm (Japan).

XPS measurements were performed on an ESCALABMK II X-ray photoelectron spectrometer using Mg as the exciting source. SEM measurements were carried out on a XL30 ESEM FEG scanning electron microscope at an accelerating voltage of 20 kV.

**Electrochemical measurements:** Electrochemical measurements were performed with a CHI 660E potentiostat (CH Instruments, China) in a standard three-electrode setup with the prepared samples as the working electrode, a graphite rod as the counter electrode, the Hg/HgO electrode as the reference electrode. The OER activity was evaluated using linear sweep voltammetry (LSV) with a sweep rate of 5 mV s<sup>-1</sup>. Electrochemical impedance spectroscopy (EIS) was measured at a frequency between 0.1 Hz and 10<sup>6</sup> Hz. The tests were performed in 1 M KOH Solution. All the potentials were displayed versus reversible hydrogen electrode (RHE) by the formula:  $E(\text{RHE}) = E(\text{Hg/HgO}) + 0.098 + 0.059 \times \text{pH}$ .

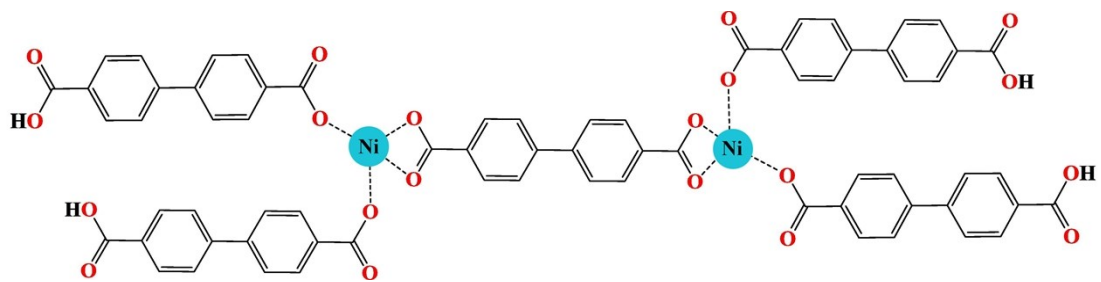

**Fig. S1.** Atomic structural diagram of Ni-MOF.

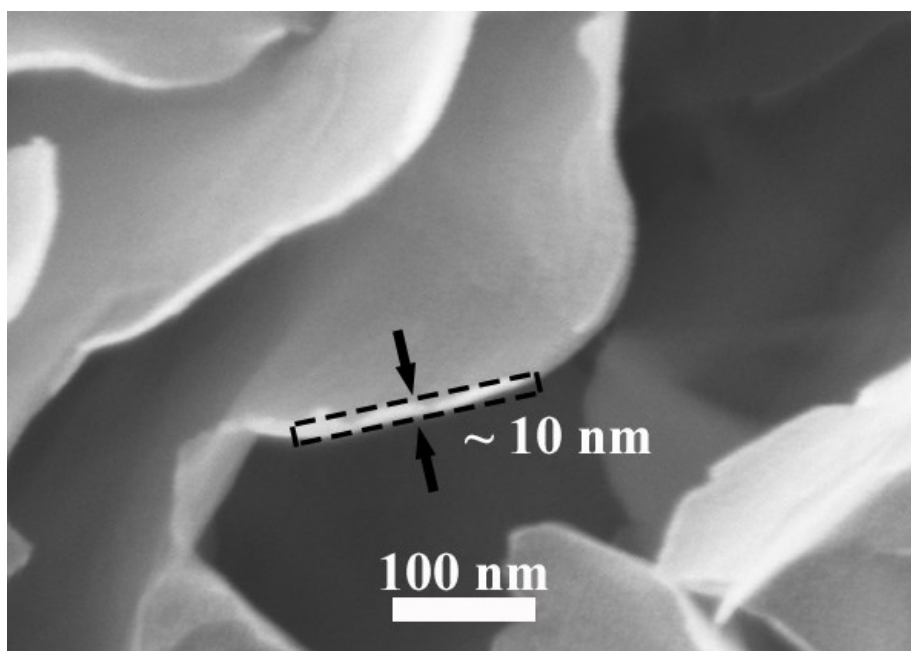

**Fig. S2.** SEM image of Ni-MOF nanosheet.

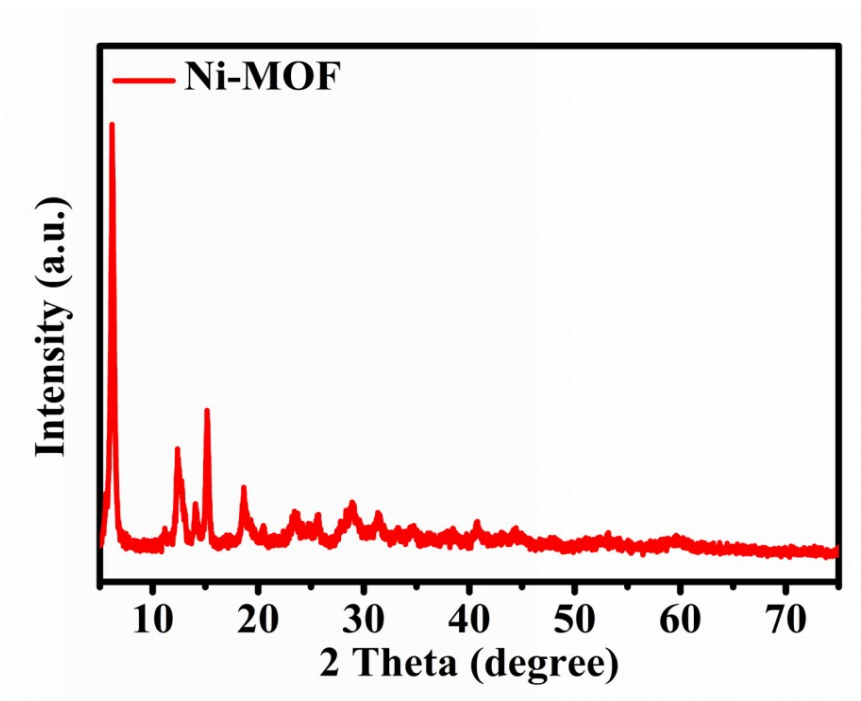

Fig. S3. XRD pattern for Ni-MOF scratched down from NF.

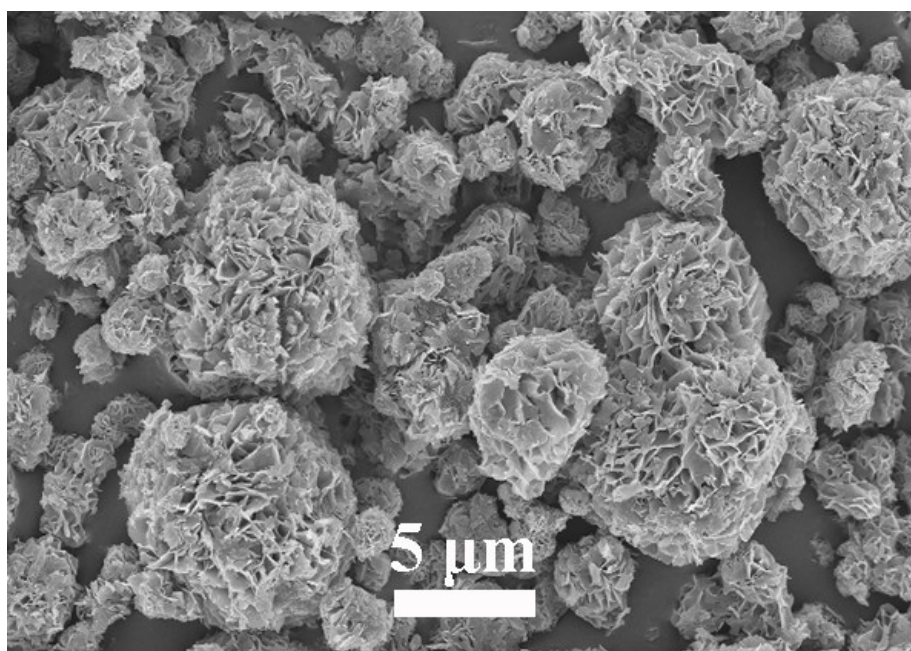

**Fig. S4.** SEM image of Ni-MOF powder.

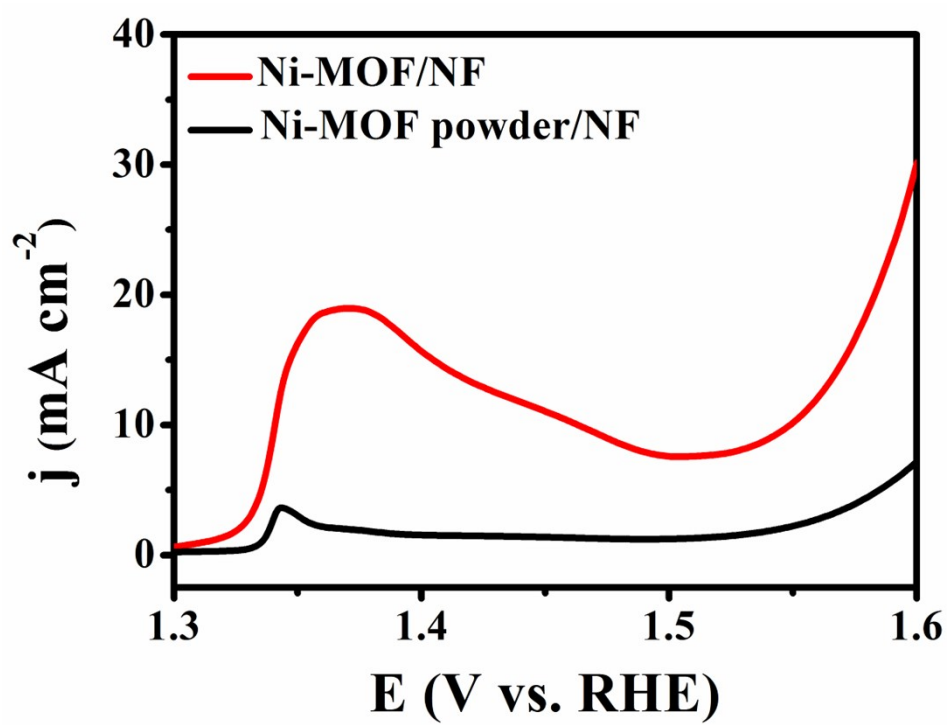

**Fig. S5.** A local view of the LSV curves for Ni-MOF/NF and Ni-MOF powder/NF.

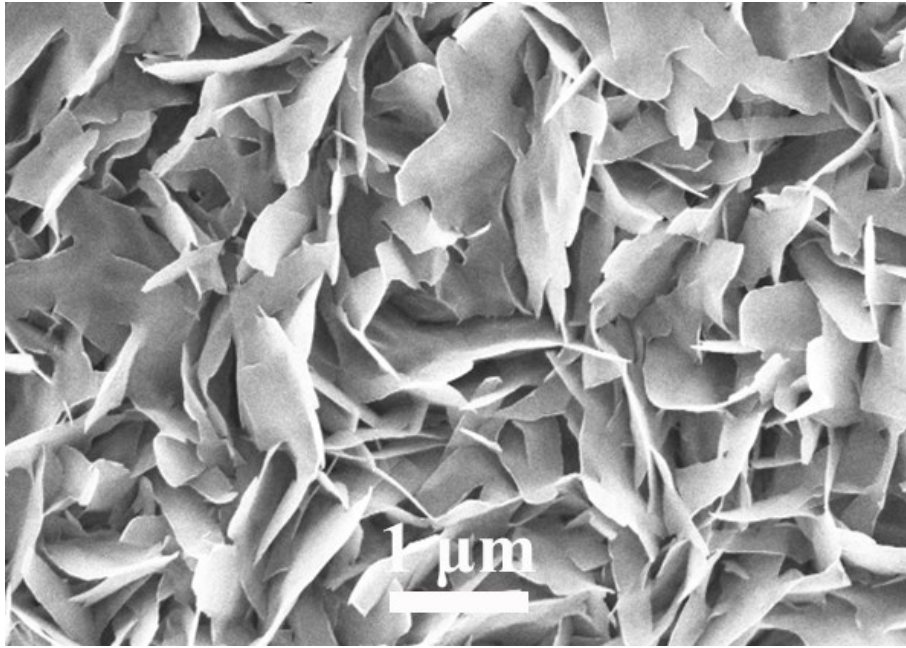

**Fig. S6.** SEM image of Ni-MOF/NF after the oxidation of  $\text{Ni}^{2+}$  to  $\text{Ni}^{3+}$  before OER.



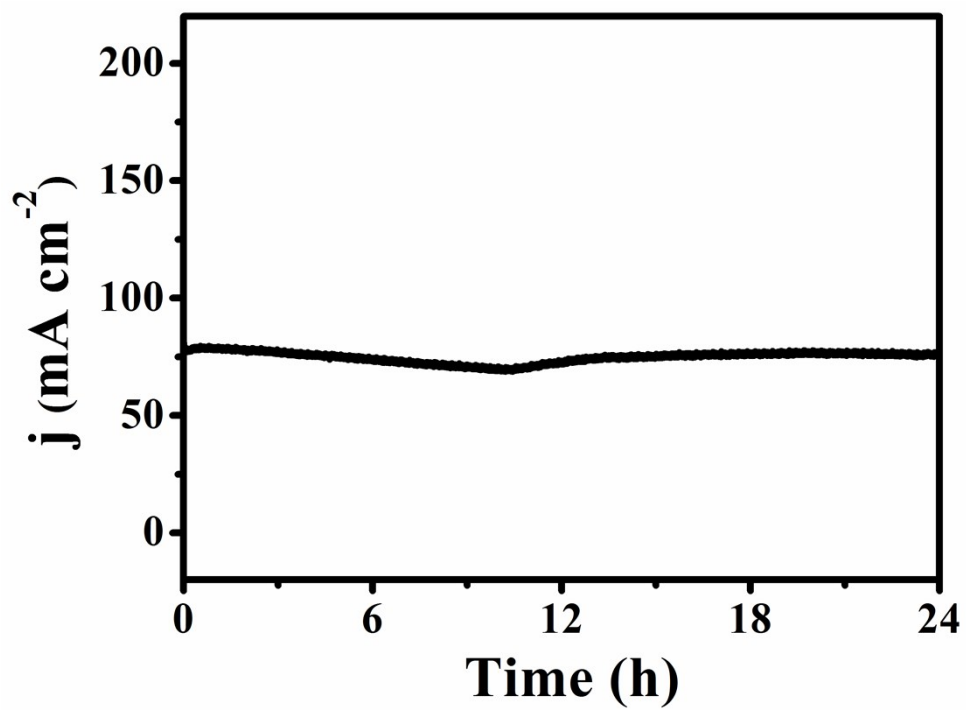

Fig. S7. Time-dependent current density curve for Ni-MOF/NF.

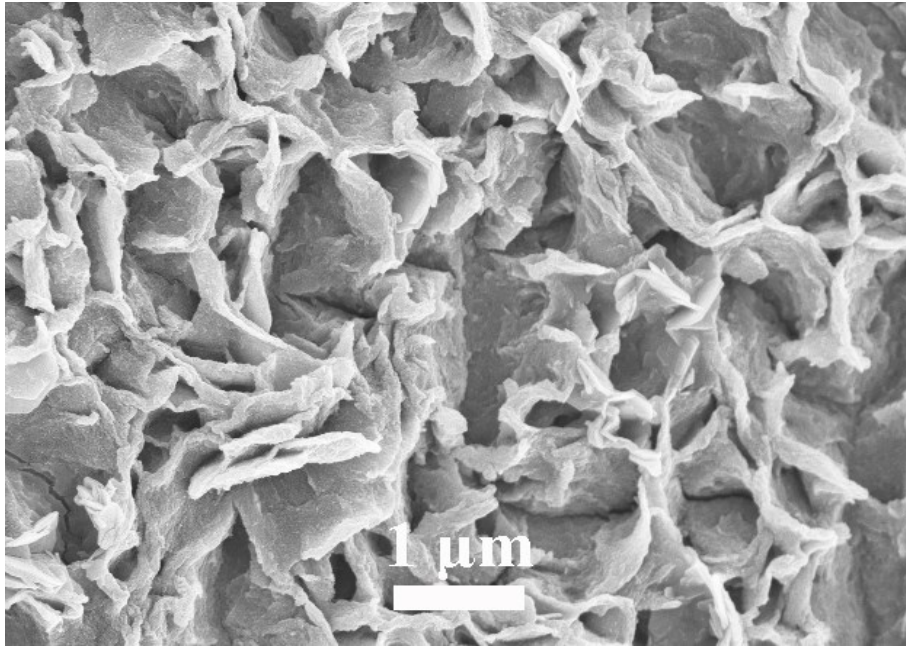

**Fig. S8.** SEM image of Ni-MOF/NF after OER electrolysis.

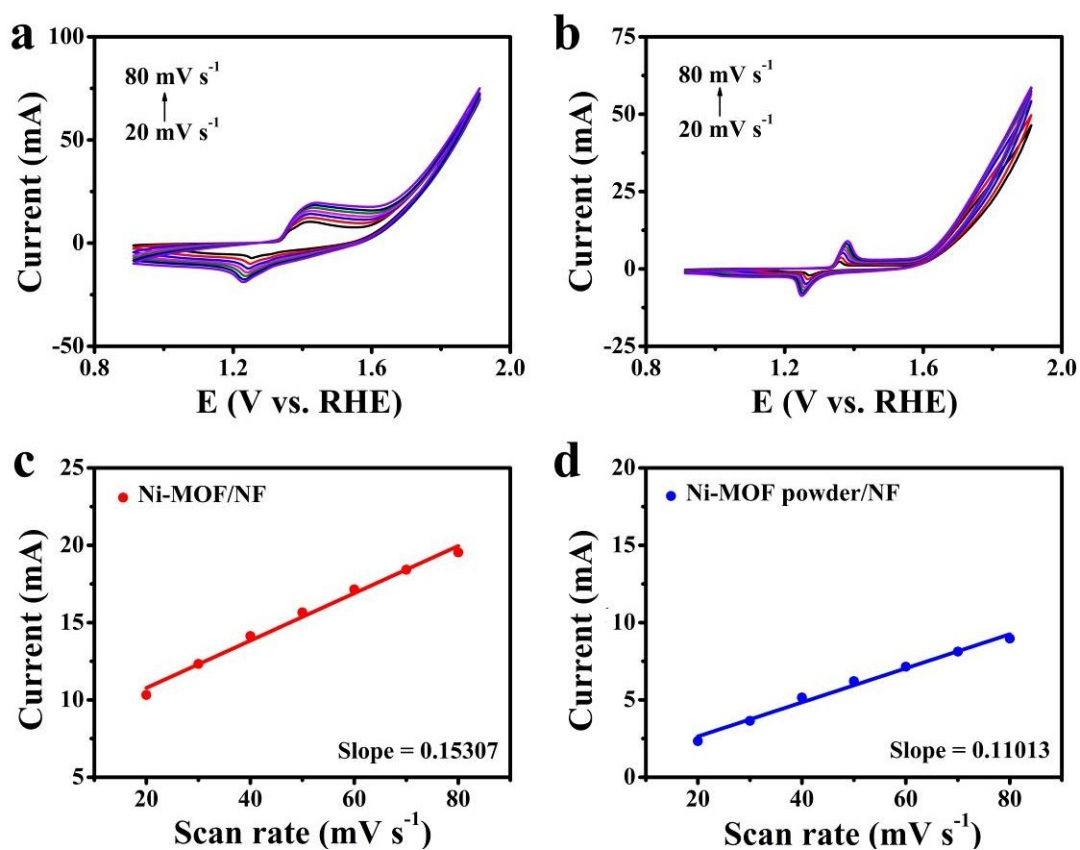

**Fig. S9.** CVs of (a) Ni-MOF/NF and (b) Ni-MOF powder/NF under different scan rates increasing from 20 to 80  $\text{mV s}^{-1}$  in 1.0 M KOH. Linear relationship of the oxidation peak currents vs. scan rates for (c) Ni-MOF/NF and (d) Ni-MOF powder/NF.

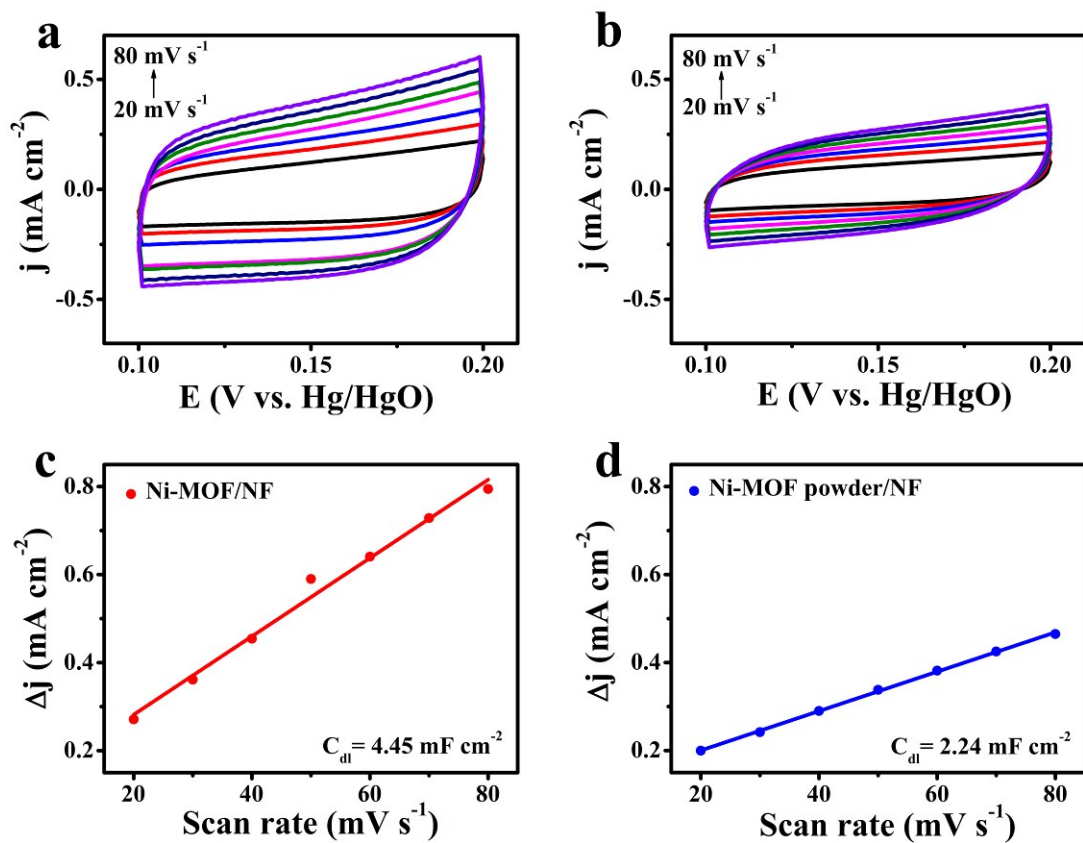

**Fig. S10.** (a) Ni-MOF/NF and (b) Ni-MOF powder/NF in the non-faradaic capacitance current range at scan rates increasing from 20 to 80 mV s<sup>-1</sup>. (c) and (d) the capacitive currents at 0.15 V vs. Hg/HgO as a function of scan rate for Ni-MOF/NF and Ni-MOF powder/NF.

**Table S1.** Comparison of OER performance for Ni-MOF/NF with other Ni-based electrocatalysts in alkaline media.

| Catalyst                                     | j (mA cm <sup>-2</sup> ) | $\eta$ (mV) | Electrolyte | Ref.      |
|----------------------------------------------|--------------------------|-------------|-------------|-----------|
| Ni-MOF/NF                                    | 20/100                   | 350/450     | 1.0 M KOH   | This work |
| Ni <sub>3</sub> N/NF                         | 100                      | 470         | 1.0 M KOH   | 1         |
| Ni/CTF                                       | 10                       | 374         | 1.0 M KOH   | 2         |
| ALD NiS <sub>x</sub>                         | 10                       | 372         | 1.0 M KOH   | 3         |
| $\beta$ -Ni(OH) <sub>2</sub>                 | 10                       | 444         | 1.0 M KOH   | 4         |
| NiOOH                                        | 10                       | 525         | 1.0 M KOH   | 5         |
| NiOOH nanosheets                             | 10                       | ~370        | 1.0 M KOH   | 6         |
| NiO/NF                                       | 10                       | 390         | 1.0 M KOH   | 7         |
| Ni-MOF/NF                                    | 10                       | 362         | 1.0 M KOH   | 8         |
| Co <sub>x</sub> Ni <sub>7-x</sub>            | 10                       | 370         | 1.0 M KOH   | 9         |
| NiCo LDH                                     | 10                       | 367         | 1.0 M KOH   | 10        |
| CoNi SUNOE                                   | 10                       | 450         | 1.0 M KOH   | 11        |
| NiCo <sub>2</sub> O <sub>4</sub> nanoneedles | 10                       | 565         | 1.0 M KOH   | 12        |
| Fe-Ni oxide                                  | 10                       | >375        | 1.0 M KOH   | 13        |
| Fe <sub>3</sub> Pt/Ni <sub>3</sub> FeN       | 10                       | 370         | 1.0 M KOH   | 14        |

## References

- 1 M. Shalom, D. Ressnig, X. Yang, G. Clavel, T. P. Fellingner and M. Antonietti, Nickel nitride as an efficient electrocatalyst for water splitting, *J. Mater. Chem. A*, 2015, **3**, 8171–8177.
- 2 S. Ozturk, Y. Xiao, D. Dietrich, B. Giesen, J. Barthel, J. Ying, X. Yang and C. Janiak, Nickel nanoparticles supported on a covalent triazine framework as electrocatalyst for oxygen evolution reaction and oxygen reduction reactions, *Beilstein J. Nanotechnol.*, 2020, **11**, 770–781.
- 3 H. Li, Y. Shao, Y. Su, Y. Gao and X. Wang, Vapor-phase atomic layer deposition of nickel sulfide and its application for efficient oxygen-evolution electrocatalysis, *Chem. Mater.*, 2016, **28**, 1155–1164.
- 4 M. Gao, W. Sheng, Z. Zhuang, Q. Fang, S. Gu, J. Jiang and Y. Yan, Efficient water oxidation using nanostructured alpha-nickel-hydroxide as an electrocatalyst, *J. Am. Chem. Soc.*, 2014, **136**, 7077–7084.
- 5 S. Klaus, Y. Cai, M. W. Louie, L. Trotochaud and A. T. Bell, Effects of Fe electrolyte impurities on Ni(OH)<sub>2</sub>/NiOOH structure and oxygen evolution activity, *J. Phys. Chem. C*, 2015, **119**, 7243–7254.
- 6 Y. Jin, S. Huang, X. Yue, C. Shu and P. Shen, Highly stable and efficient non-precious metal electrocatalysts of Mo-doped NiOOH nanosheets for oxygen evolution reaction, *Int. J. Hydrogen Energy*, 2018, **43**, 12140–12145.
- 7 G. Han, Y. Liu, W. Hu, B. Dong, X. Li, X. Shang, Y. Chai, Y. Liu and C. Liu, Three dimensional nickel oxides/nickel structure by in situ electro-oxidation of nickel foam as robust electrocatalyst for oxygen evolution reaction, *Appl. Surf. Sci.*, 2015, **359**, 172–176.
- 8 X. Wang, B. Li, Y. Wu, A. Tsamis, H. Yu, S. Liu, J. Zhao, Y. Li and D. Li, Investigation on the component evolution of a tetranuclear nickel-cluster-based metal-organic framework in an electrochemical oxidation reaction, *Inorg. Chem.*, 2020, **59**, 4764–4771.

- 9 D. Cai, A. Han, P. Yang, Y. Wu, P. Du, M. Kurmoo and M. Zeng, Heptanuclear Co, Ni and mixed Co-Ni clusters as high-performance water oxidation electrocatalysts, *Electrochim. Acta*, 2017, **249**, 343–352.
- 10 H. Liang, F. Meng, M. Caban-Acevedo, L. Li, A. Forticaux, L. Xiu, Z. Wang and S. Jin, Hydrothermal continuous flow synthesis and exfoliation of NiCo layered double hydroxide nanosheets for enhanced oxygen evolution catalysis, *Nano Lett.*, 2015, **15**, 1421–1427.
- 11 B. Ni and X. Wang, Edge overgrowth of spiral bimetallic hydroxides ultrathin-nanosheets for water oxidation, *Chem. Sci.*, 2015, **6**, 3572–3576.
- 12 H. Shi and G. Zhao, Water oxidation on spinel NiCo<sub>2</sub>O<sub>4</sub> nanoneedles anode: microstructures, specific surface character, and the enhanced electrocatalytic performance, *J. Phys. Chem. C*, 2014, **118**, 25939–25946.
- 13 J. Landon, E. Demeter, N. İnoğlu, C. Keturakis, I. E. Wachs, R. Vasić, A. I. Frenkel and J. R. Kitchin, Spectroscopic characterization of mixed Fe–Ni oxide electrocatalysts for the oxygen evolution reaction in alkaline electrolytes, *ACS Catal.*, 2012, **2**, 1793–1801.
- 14 Z. Cui, G. Fu, Y. Li and J. B. Goodenough, Ni<sub>3</sub>FeN-supported Fe<sub>3</sub>Pt intermetallic nanoalloy as a high-performance bifunctional catalyst for metal-air batteries, *Angew. Chem., Int. Ed.*, 2017, **56**, 9901–9905.
